# Supplementary material for: Structure-guided development of Pb2+-binding DNA aptamers
Source: PubMed Central journal article supplement (PMC8748701; doi:10.1038/s41598-021-04243-2), 2022-01-10
Supplement: 41598_2021_4243_MOESM1_ESM.pdf [file 41598_2021_4243_MOESM1_ESM.pdf]

# *Supporting Information*

*For*

## **Structure-guided Development of Pb<sup>2+</sup>-binding DNA Aptamers**

Hehua Liu<sup>1,+</sup>, Yanqing Gao<sup>1,+</sup>, Johnsi Mathivanan<sup>2,+</sup>, Fusheng Shen<sup>2</sup>, Xi Chen<sup>1</sup>,  
Yangyang Li<sup>1</sup>, Zhiwei Shao<sup>1</sup>, Yixi Zhang<sup>1</sup>, Qiyuan Shao<sup>1</sup>, Jia Sheng<sup>2,\*</sup>, Jianhua Gan<sup>1,\*</sup>

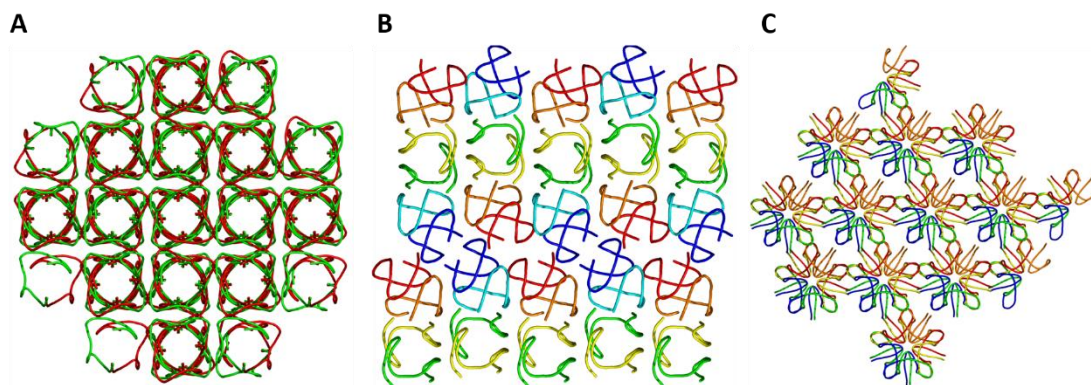

**Fig. S1:** Packing of (A) A-form TBA-Pb<sup>2+</sup> complex, (B) B-form TBA-Pb<sup>2+</sup> complex and (C) G8C-Pb<sup>2+</sup> complex in the crystal lattice. Figures were displayed using PyMOL (<http://www.pymol.org/>).

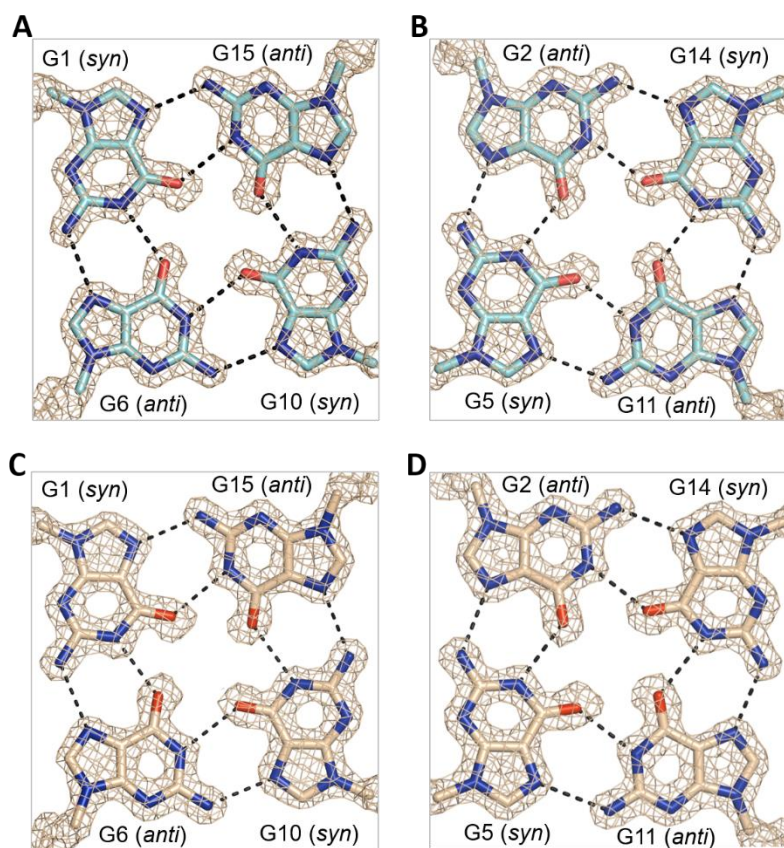

**Fig. S2:** G-tetrads observed in the A-form TBA-Pb<sup>2+</sup> complex structure. (A-B) G-tetrads formed by TBA molecule A. (C-D) G-tetrads formed by TBA molecule B. Nucleobases of the G-tetrads are shown as sticks outlined with 2F<sub>o</sub>-F<sub>c</sub> electron density maps (contoured at 1.5 σ level). The N1-O6 and N2-N7 H-bond interactions are indicated by black dashed lines. Figures were displayed using PyMOL (<http://www.pymol.org/>).

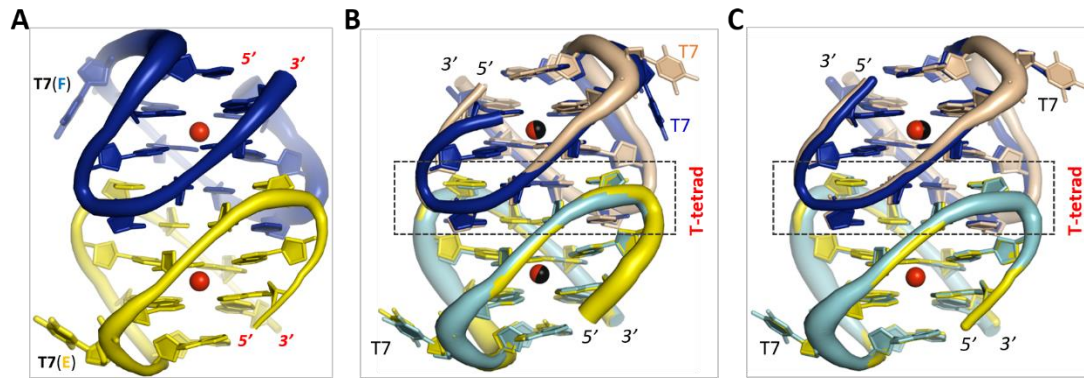

**Fig. S3:** Comparison of the A- and B-form TBA-Pb<sup>2+</sup> structure. (A) Overall folding of the EF dimer of the B-form structure. (B) Superposition of the AB dimer of the B-form structure with the A-form structure. (C) Superposition of the CD dimer of the B-form structure with the A-form structure. All dimers of the B-form structure are colored in yellow and blue. The A-form structure is colored in cyan and wheat in panels (B) and (C). Figures were displayed using PyMOL (<http://www.pymol.org/>).

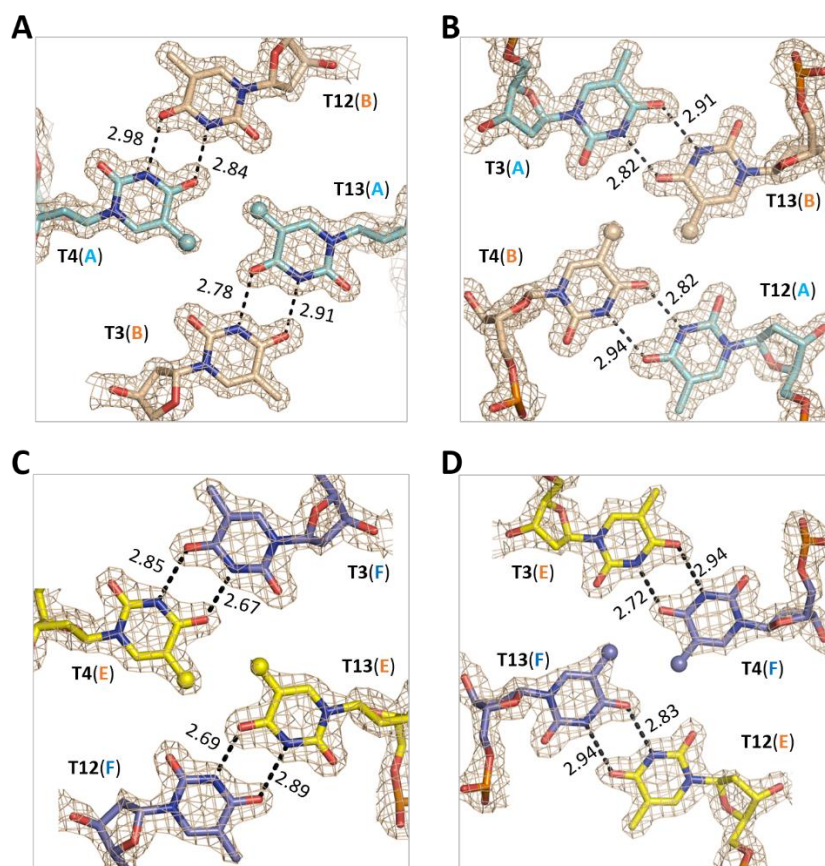

**Fig. S4:** Interactions formed between the TT linker nucleotides. **(A-B)** Detailed H-bond interactions formed between the T3T4 and T12T13 linkers of the A-form TBA-Pb<sup>2+</sup> structure. **(C-D)** Detailed H-bond interactions formed between the T3T4 and T12T13 linkers of the EF dimer of the B-form TBA-Pb<sup>2+</sup> structure. The 5-methyl groups of T4 and T13 are shown as spheres. The  $2F_o - F_c$  electron density maps are contoured at  $1.5 \sigma$  level in panels **(A)** and **(B)**, whereas they are contoured at  $1.2 \sigma$  level in panels **(C)** and **(D)**. Figures were displayed using PyMOL (<http://www.pymol.org/>).

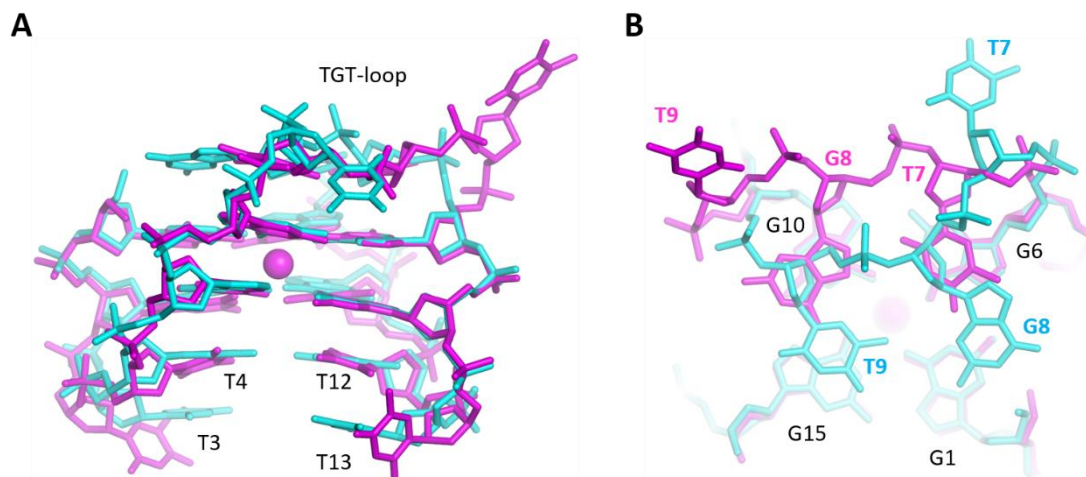

**Fig. S5:** (A) Superposition of TBA molecules of the A-form TBA-Pb<sup>2+</sup> complex and the TBA-thrombin complex (PDB\_ID: 4DII). (B) Superposition showing the conformational difference of T7G8T9 linkers. The Pb<sup>2+</sup>-complexed TBA molecule is shown as sticks in cyan. TBA and K<sup>+</sup> observed in the TBA-thrombin complex are shown as magenta sticks and sphere, respectively. Figures were displayed using PyMOL (<http://www.pymol.org/>).



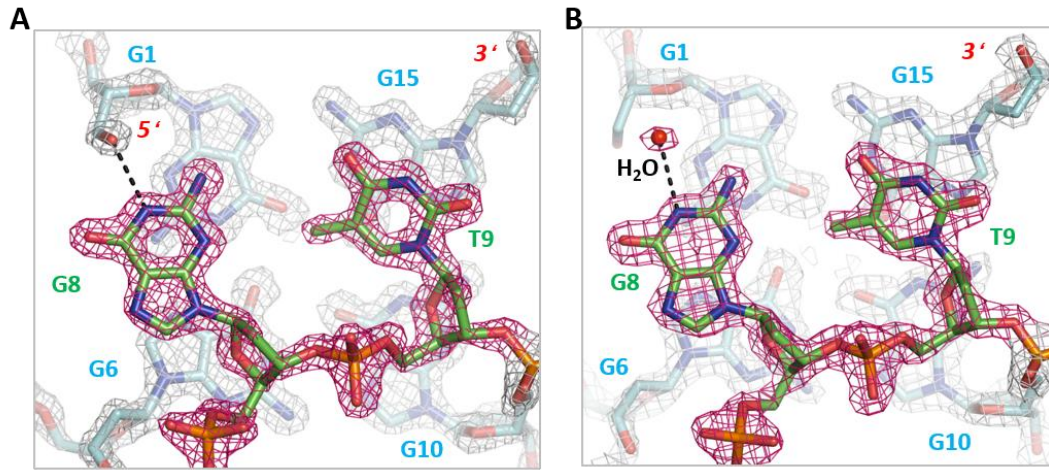

**Fig. S6:** Conformation and interaction of G8 in (A) the A-form and (B) the B-form complex structures. G8, T9 and nucleotides of the G-tetrad are shown as sticks. Water molecules are shown as red spheres. The  $2F_o-F_c$  electron density maps are all contoured at  $1.5 \sigma$  level.
